# Supplementary material
Source: publisher site journal article supplement (https://www.dovepress.com/article/377077)
Supplement: Supplementary file 1 [file get_supplementary_file.php]

**Supplementary table1**. Specific sequences of lentiviral plasmids (5’→3’)

| Human YAP forward | GAGGATCCCCGGGTACCGGTCGCCACCATGG  ATCCCGGGCAGCAGCCGC |
| --- | --- |
| Human YAP reverse | TCCTTGTAGTCCATACCTAACCATGTAAGAA  AGCTTTC |
| Mouse YAP forward | GAGGATCCCCGGGT ACCGGTCGCCACCAT  GGAGCCCGCGCAACAG |
| Mouse YAP reverse | TCCTTGTAGTCCATACCTAACCACGTGAGA  AAGCT |

**Supplementary table2**. Specific sequences of siRNAs(5’→3’)

| STAT3-siRNA | CAGCACAACCUUCGAAGAA |
| --- | --- |
| Negative control-siRNA | UUCUCCGAACGUGUCACGU |

**Supplementary table3**. Specific primer sequences of Q-PCR (5’→3’)

| hYAP-F’ | CTCGGCTTCAGGTCCTCTTC |
| --- | --- |
| hYAP-R’ | AGGGTCAAGCCTTGGGTCTA |
| GAPDH-F’ | GATTTGGTCGTATTGGGCGC |
| GAPDH-R’ | TTCCCGTTCTCAGCCTTGAC |
